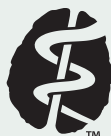

# The American Journal of Psychiatry

Official Journal of the American Psychiatric Association

## Officers 2017–2018

### President

Anita S. Everett, M.D.

### President-Elect

Altha J. Stewart, M.D.

### Treasurer

Bruce J. Schwartz, M.D.

### Secretary

Philip R. Muskin, M.D., M.A.

### Assembly

#### Speaker

Theresa M. Miskimen, M.D.

#### Speaker-Elect

James R. Batterson, M.D.

#### Recorder

Steven R. Daviss, M.D.

### Office of the CEO and Medical Director

#### CEO and Medical Director

Saul Levin, M.D., M.P.A., F.R.C.P.-E.

### Board of Trustees

Jeffrey Akaka, M.D.

Lama Bazzi, M.D.

Renée L. Binder, M.D.

Jenny Boyer, M.D., Ph.D., J.D.

Ronald M. Burd, M.D.

Tanuja Gandhi, M.D.

Jeffrey L. Geller, M.D., M.P.H.

Uchenna B. Okoye, M.D., M.P.H.

Maria A. Oquendo, M.D., Ph.D.

Roger Peele, M.D.

Vivian B. Pender, M.D.

Paul Summergrad, M.D.

Richard F. Summers, M.D.

Ramaswamy Viswanathan, M.D., D.M.Sc.

Melinda Young, M.D.

## Editorial Board

### Editor

Robert Freedman, M.D.

### Deputy Editors

David A. Lewis, M.D.

Robert Michels, M.D.

Daniel S. Pine, M.D.

A. John Rush, M.D.

Susan K. Schultz, M.D.

Carol A. Tamminga, M.D.

### Associate Editors

Alan Brown, M.D., M.P.H.

Tyrone Cannon, Ph.D.

Benjamin G. Druss, M.D., M.P.H.

Felton Earls, M.D.

Graham J. Emslie, M.D.

Javier I. Escobar, M.D., M.Sc.

Yasmin Hurd, Ph.D.

Carlos López Jaramillo, M.D., M.Sc.,  
Ph.D.

Joan L. Luby, M.D.

Constantine G. Lyketsos, M.D., M.H.S.

Helen S. Mayberg, M.D., F.R.C.P.C.

Terrie E. Moffitt, Ph.D.

Rajesh Narendran, M.D.

Roy Perlis, M.D.

Anita Thapar, M.B.B.Ch., F.R.C.Psych.,  
Ph.D., F.Med.Sci.

Mauricio Tohen, M.D., Dr.PH., M.B.A.

Eduard Vieta, M.D., Ph.D.

John T. Walkup, M.D.

Katherine L. Wisner, M.D., M.S.

Xin Yu, M.D.

### Editor Emerita

Nancy C. Andreasen, M.D., Ph.D.

### Former Editors

Amariah Brigham, M.D., 1844–1849

T. Romeyn Beck, M.D., 1849–1854

John P. Gray, M.D., 1854–1886

G. Alder Blumer, M.D., 1886–1894

Richard Dewey, M.D., 1894–1897

Henry M. Hurd, M.D., 1897–1904

Edward N. Brush, M.D., 1904–1931

Clarence B. Farrar, M.D., 1931–1965

Francis J. Braceland, M.D., 1965–1978

John C. Nemiah, M.D., 1978–1993

### Editorial Staff

#### Executive Editor

Michael D. Roy

#### Senior Editor

John J. Guardiano, Ph.D.

#### Production Manager

Susan Westrate

#### Assistant Editor

Angela Moore

#### Online Content Manager

Michael Pogachar

#### Editorial Support Services Manager

Heidi Koch

#### Editorial Assistant

Linda LaCour

#### Editorial Assistant/ Permissions Coordinator

Efrem Tuquabo

#### Spanish Content Manager

Sergi Casals, M.A.

#### Assistants to the Editors

Lois Lilienthal

Laura English

Rachel Hogg

Russell A. Scholl

#### Interim Publisher

John McDuffie
